# Supplementary material for: The anticonvulsant sulfamide JNJ-26990990 and its S,S-dioxide analog strongly inhibit carbonic anhydrases: solution and X-ray crystallographic studies
Source: Royal Society of Chemistry journal article supplement (doi:10.1039/c6ob00803h), 2016-01-01
Supplement: c6ob00803h1.pdf [file c6ob00803h1.pdf]

## Supporting Information

### The anticonvulsant sulfamide JNJ-26990990 and its S,S-dioxide analog strongly inhibit carbonic anhydrases: solution and X-ray crystallographic studies

Anna Di Fiore,<sup>a</sup> Giuseppina De Simone,<sup>\*a</sup> Vincenzo Alterio,<sup>a</sup> Vincenzo Riccio,<sup>a</sup> Jean-Yves Winum,<sup>b</sup> Fabrizio Carta<sup>c</sup> and Claudiu T. Supuran<sup>\*c</sup>

| Compound    | Inhibitor concentration | Slope | %Free Enzyme | %Inhibition |         |
|-------------|-------------------------|-------|--------------|-------------|---------|
| hCAI 9.3 nM |                         |       | 100%         | 0%          | 0,0E+00 |
| 1           | 10-9M                   | 1,516 | 100%         | 0%          | 1,0E-09 |
| 1           | 10-8M                   | 1,466 | 97%          | 3%          | 1,0E-08 |
| 1           | 10-7M                   | 0,9   | 59%          | 41%         | 1,0E-07 |
| 1           | 10-6M                   | 0,701 | 46%          | 54%         | 1,0E-06 |
| 1           | 10-4M                   | 0,67  | 44%          | 56%         | 1,0E-04 |

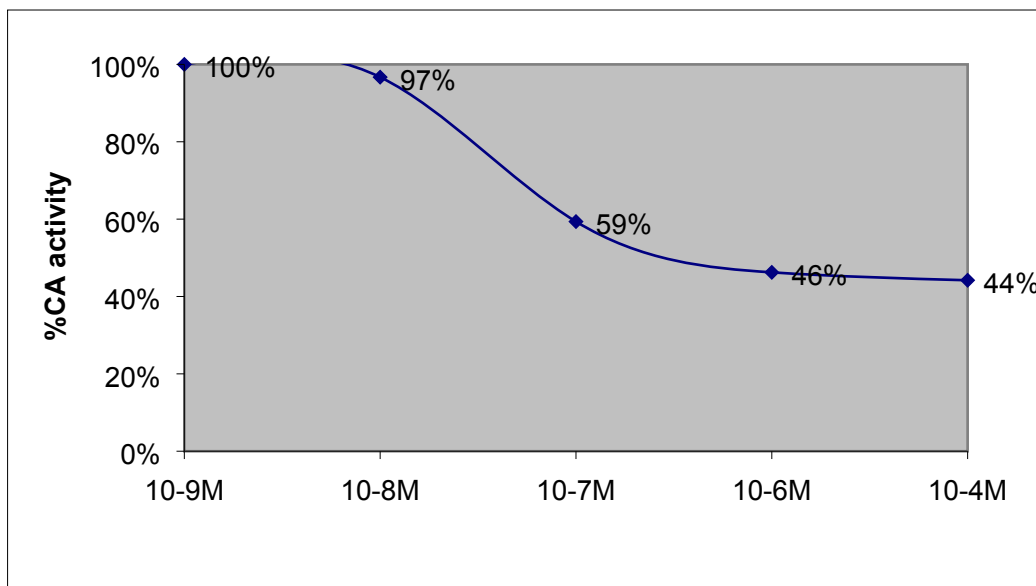

IC<sub>50</sub> = 742 nM

By applying Cheng-Prusoff a K<sub>I</sub> of 451±30 was obtained.

| Compound     | Inhibitor concentration | Slope | %Free Enzyme | %Inhibition |         |
|--------------|-------------------------|-------|--------------|-------------|---------|
| hCAII 7.5 nM | 0                       |       | 100%         | 0%          | 0,0E+00 |
| 1            | 10-9M                   | 1,354 | 100%         | 0%          | 1,0E-09 |
| 1            | 10-8M                   | 1,265 | 94%          | 6%          | 1,0E-08 |
| 1            | 10-7M                   | 0,987 | 73%          | 27%         | 1,0E-07 |
| 1            | 10-6M                   | 0,653 | 48%          | 52%         | 1,0E-06 |
| 1            | 10-4M                   | 0,432 | 32%          | 68%         | 1,0E-04 |

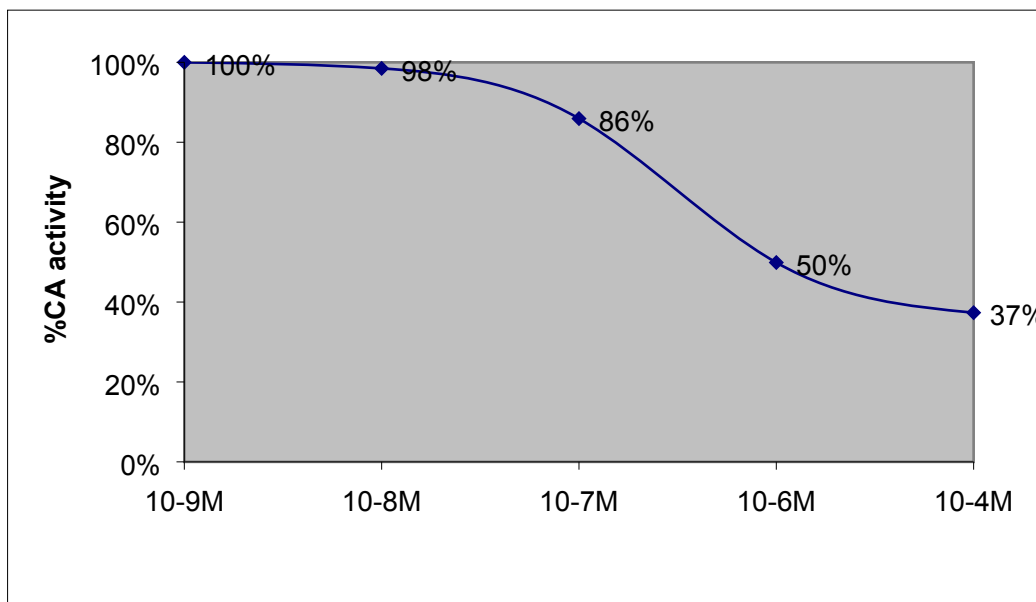

**IC<sub>50</sub> 7,6932E-08**

IC<sub>50</sub> = 76.9 nM

By applying Cheng-Prusoff a K<sub>I</sub> of 34.8±1.7 was obtained.

| Compound       | Inhibitor concentration | Slope | %Free Enzyme | %Inhibition |         |
|----------------|-------------------------|-------|--------------|-------------|---------|
| hCAVII 10.6 nM | 0                       |       | 100%         | 0%          | 0,0E+00 |
| 1              | 10-9M                   | 1,456 | 100%         | 0%          | 1,0E-09 |
| 1              | 10-8M                   | 1,366 | 94%          | 6%          | 1,0E-08 |
| 1              | 10-7M                   | 1,032 | 71%          | 29%         | 1,0E-07 |
| 1              | 10-6M                   | 0,613 | 42%          | 58%         | 1,0E-06 |
| 1              | 10-4M                   | 0,519 | 36%          | 64%         | 1,0E-04 |

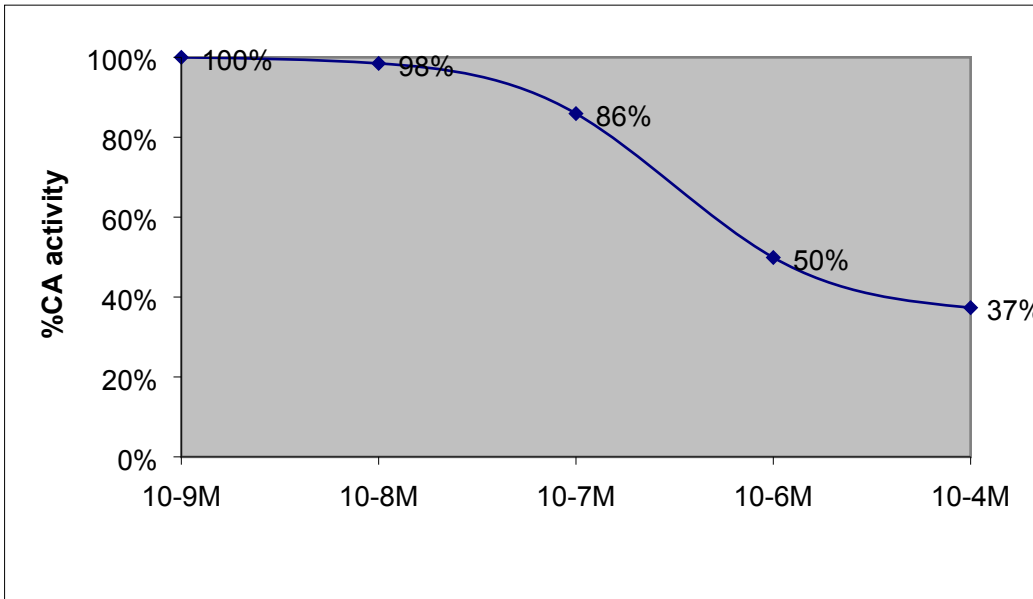

**IC<sub>50</sub> 8,0889E-08**

IC<sub>50</sub> = 80.9 nM

By applying Cheng-Prusoff a K<sub>I</sub> of 49.2±3 was obtained.

| Compound     | Inhibitor concentration | Slope | %Free Enzyme | %Inhibition |         |
|--------------|-------------------------|-------|--------------|-------------|---------|
| hCAIX 8.4 nM | 0                       |       | 100%         | 0%          | 0,0E+00 |
| 1            | 10-9M                   | 1,589 | 100%         | 0%          | 1,0E-09 |
| 1            | 10-8M                   | 1,204 | 76%          | 24%         | 1,0E-08 |
| 1            | 10-7M                   | 0,593 | 37%          | 63%         | 1,0E-07 |
| 1            | 10-6M                   | 0,323 | 20%          | 80%         | 1,0E-06 |
| 1            | 10-4M                   | 0,232 | 15%          | 85%         | 1,0E-04 |

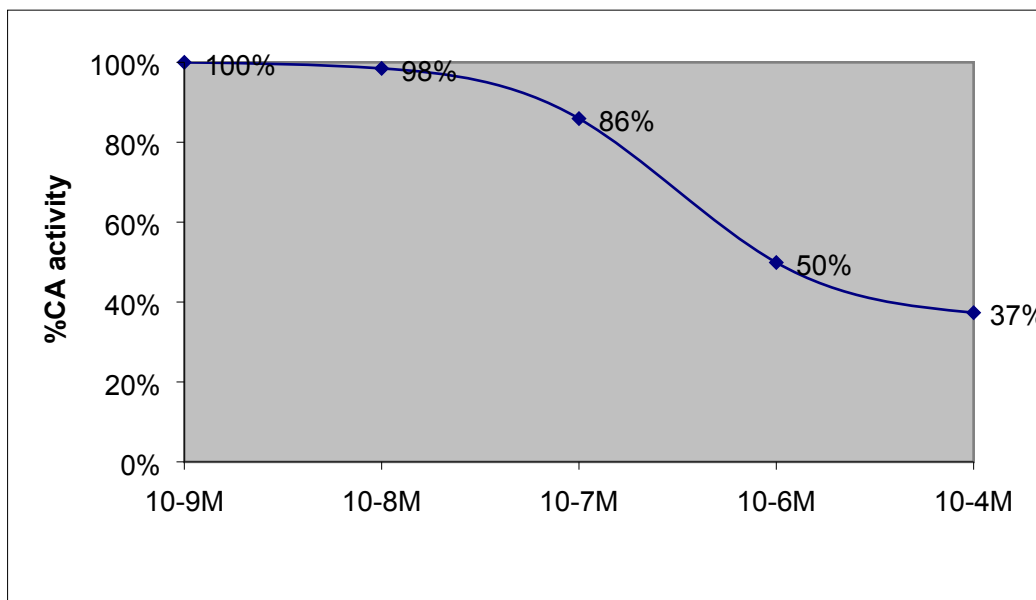

**IC<sub>50</sub>**      **2,0636E-08**

IC<sub>50</sub> = 20.6 nM

By applying Cheng-Prusoff a K<sub>I</sub> of 12.1±1 was obtained.

| Compound       | Inhibitor concentration | Slope | %Free Enzyme | %Inhibition |         |
|----------------|-------------------------|-------|--------------|-------------|---------|
| hCAXII 12.6 nM | 0                       |       | 100%         | 0%          | 0,0E+00 |
| 1              | 10-9M                   | 1,613 | 100%         | 0%          | 1,0E-09 |
| 1              | 10-8M                   | 1,117 | 69%          | 31%         | 1,0E-08 |
| 1              | 10-7M                   | 0,613 | 38%          | 62%         | 1,0E-07 |
| 1              | 10-6M                   | 0,345 | 21%          | 79%         | 1,0E-06 |
| 1              | 10-4M                   | 0,321 | 20%          | 80%         | 1,0E-04 |

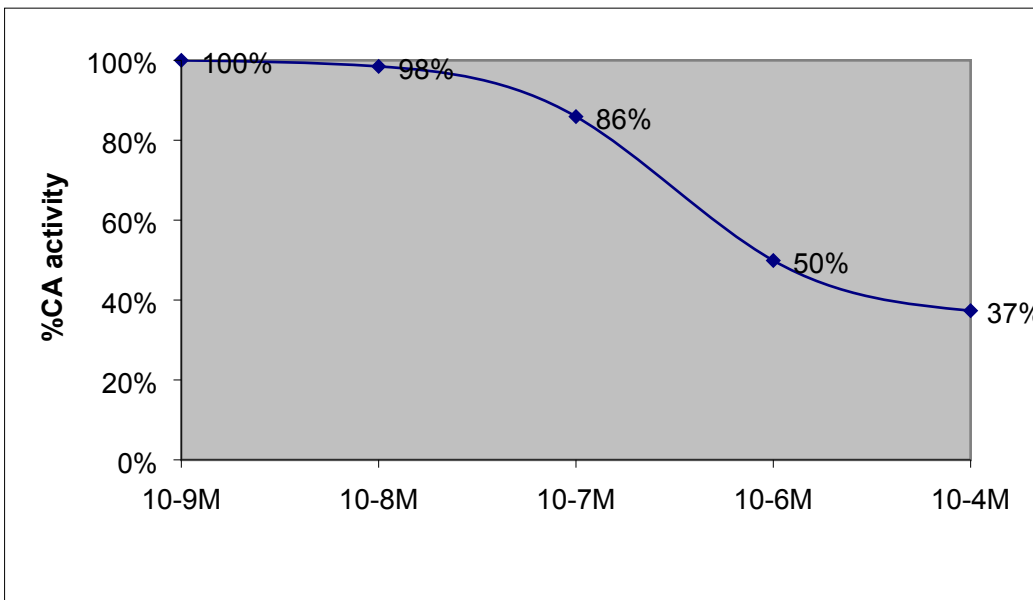

**IC50**      **1,626E-08**

IC<sub>50</sub> = 16.3 nM

By applying Cheng-Prusoff a K<sub>I</sub> of 8.3±0.4 was obtained.

| Compound       | Inhibitor concentration | Slope | %Free Enzyme | %Inhibition |         |
|----------------|-------------------------|-------|--------------|-------------|---------|
| hCAXIV 15.4 nM | 0                       |       | 100%         | 0%          | 0,0E+00 |
| 1              | 10-9M                   | 1,513 | 100%         | 0%          | 1,0E-09 |
| 1              | 10-8M                   | 1,324 | 88%          | 12%         | 1,0E-08 |
| 1              | 10-7M                   | 1,025 | 68%          | 32%         | 1,0E-07 |
| 1              | 10-6M                   | 0,733 | 48%          | 52%         | 1,0E-06 |
| 1              | 10-4M                   | 0,632 | 42%          | 58%         | 1,0E-04 |



**IC50**      **4,0026E-08**

IC<sub>50</sub> = 40.0 nM

By applying Cheng-Prusoff a K<sub>I</sub> of 23.5±1.1 was obtained.

| Compound    | Inhibitor concentration | Slope | %Free Enzyme | %Inhibition |         |
|-------------|-------------------------|-------|--------------|-------------|---------|
| hCAI 9.3 nM | 0                       |       | 100%         | 0%          | 0,0E+00 |
| 4           | 10-9M                   | 1,449 | 100%         | 0%          | 1,0E-09 |
| 4           | 10-8M                   | 1,427 | 98%          | 2%          | 1,0E-08 |
| 4           | 10-7M                   | 1,245 | 86%          | 14%         | 1,0E-07 |
| 4           | 10-6M                   | 0,723 | 50%          | 50%         | 1,0E-06 |
| 4           | 10-4M                   | 0,541 | 37%          | 63%         | 1,0E-04 |

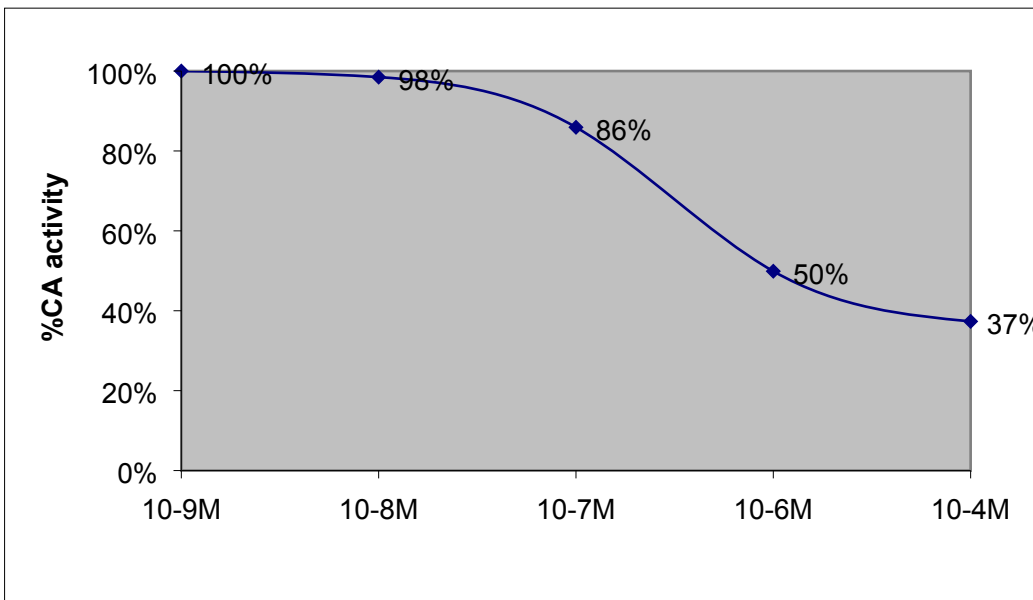

**IC<sub>50</sub>**      5,2932E-07

IC<sub>50</sub> = 529.3 nM

By applying Cheng-Prusoff a K<sub>I</sub> of 362±21 was obtained.

| Compound     | Inhibitor concentration | Slope  | %Free Enzyme | %Inhibition |         |
|--------------|-------------------------|--------|--------------|-------------|---------|
| hCAII 7.5 nM | 0                       |        | 100%         | 0%          | 0,0E+00 |
| 4            | 10-9M                   | 1,356  | 100%         | 0%          | 1,0E-09 |
| 4            | 10-8M                   | 1,036  | 76%          | 24%         | 1,0E-08 |
| 4            | 10-7M                   | 0,621  | 46%          | 54%         | 1,0E-07 |
| 4            | 10-6M                   | 0,4295 | 32%          | 68%         | 1,0E-06 |
| 4            | 10-4M                   | 0,319  | 24%          | 76%         | 1,0E-04 |



**IC<sub>50</sub> 3,1188E-08**

IC<sub>50</sub> = 31.2 nM

By applying Cheng-Prusoff a K<sub>I</sub> of 18.5±0.8 was obtained.



| Compound       | Inhibitor concentration | Slope  | %Free Enzyme | %Inhibition |         |
|----------------|-------------------------|--------|--------------|-------------|---------|
| hCAVII 10.6 nM | 0                       |        | 100%         | 0%          | 0,0E+00 |
| 4              | 10-9M                   | 1,356  | 100%         | 0%          | 1,0E-09 |
| 4              | 10-8M                   | 1,236  | 91%          | 9%          | 1,0E-08 |
| 4              | 10-7M                   | 0,924  | 68%          | 32%         | 1,0E-07 |
| 4              | 10-6M                   | 0,4295 | 32%          | 68%         | 1,0E-06 |
| 4              | 10-4M                   | 0,319  | 24%          | 76%         | 1,0E-04 |

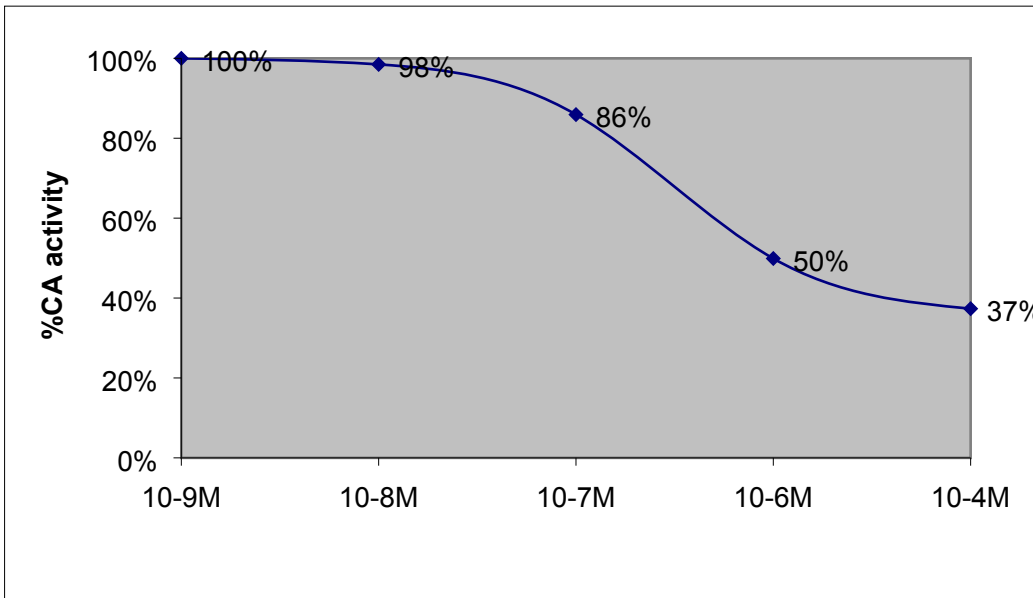

**IC<sub>50</sub> 5,65E-08**

IC<sub>50</sub> = 56.5 nM

By applying Cheng-Prusoff a K<sub>I</sub> of 26.1±1.4 was obtained.

| Compound     | Inhibitor concentration | Slope | %Free Enzyme | %Inhibition |         |
|--------------|-------------------------|-------|--------------|-------------|---------|
| hCAIX 8.4 nM | 0                       |       | 100%         | 0%          | 0,0E+00 |
| 4            | 10-9M                   | 1,647 | 100%         | 0%          | 1,0E-09 |
| 4            | 10-8M                   | 1,213 | 74%          | 26%         | 1,0E-08 |
| 4            | 10-7M                   | 0,718 | 44%          | 56%         | 1,0E-07 |
| 4            | 10-6M                   | 0,441 | 27%          | 73%         | 1,0E-06 |
| 4            | 10-4M                   | 0,421 | 26%          | 74%         | 1,0E-04 |



**IC50**      **1,8975E-08**

IC<sub>50</sub> = 18.9 nM

By applying Cheng-Prusoff a K<sub>I</sub> of 10.2±0.9 was obtained.

| Compound/<br>hCA XII 12.6nM | Inhibitor<br>concentration | Slope | %Free Enzyme | %Inhibition |
|-----------------------------|----------------------------|-------|--------------|-------------|
| 4                           | 10-9M                      | 3,713 | 100%         | 0%          |
| 4                           | 10-8M                      | 1,729 | 47%          | 53%         |
| 4                           | 10-7M                      | 1,146 | 31%          | 69%         |
| 4                           | 10-6M                      | 0,739 | 20%          | 80%         |
| 4                           | 10-4M                      | 0,413 | 11%          | 89%         |

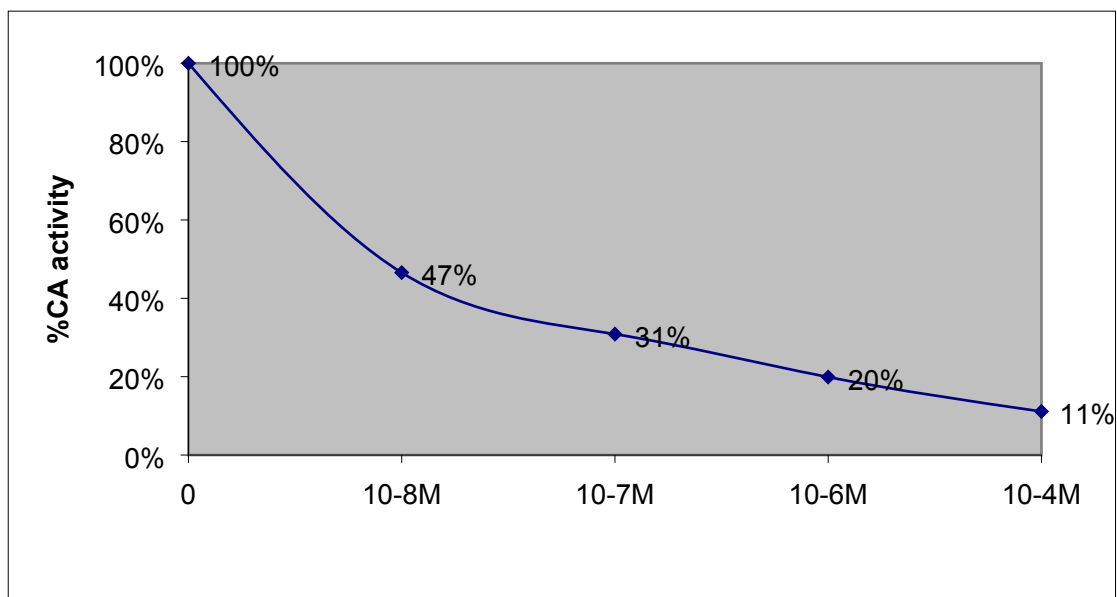

IC<sub>50</sub> 9.3574E-09

By applying Cheng-Prusoff a K<sub>I</sub> of 7.5±0.6 was obtained.

| Compound       | Inhibitor concentration | Slope | %Free Enzyme | %Inhibition |         |
|----------------|-------------------------|-------|--------------|-------------|---------|
| hCAXIV 15.4 nM | 0                       |       | 100%         | 0%          | 0,0E+00 |
| 4              | 10-9M                   | 1,535 | 100%         | 0%          | 1,0E-09 |
| 4              | 10-8M                   | 1,232 | 80%          | 20%         | 1,0E-08 |
| 4              | 10-7M                   | 0,639 | 42%          | 58%         | 1,0E-07 |
| 4              | 10-6M                   | 0,503 | 33%          | 67%         | 1,0E-06 |
| 4              | 10-4M                   | 0,411 | 27%          | 73%         | 1,0E-04 |



**IC<sub>50</sub> 2,533E-08**

IC<sub>50</sub> = 25.3 nM

By applying Cheng-Prusoff a K<sub>I</sub> of 14.6±0.9 was obtained.
